# Supplementary material
Source: ML conference proceedings conference paper supplement (https://openaccess.thecvf.com/content/ICCV_2019/html/Li_Making_the_Invisible_ICCV_2019_paper.html)
Supplement: Supplementary file 3 [file Li_Making_the_Invisible_ICCV_2019_supplemental.zip]

Archive with 7 entries (4 files):
- Camera_ready_supplementary/
- Camera_ready_supplementary/.DS_Store
- __MACOSX/
- __MACOSX/Camera_ready_supplementary/
- __MACOSX/Camera_ready_supplementary/._.DS_Store
- Camera_ready_supplementary/supplementary.pdf
- __MACOSX/Camera_ready_supplementary/._supplementary.pdf
